# Supplementary material
Source: PubMed Central journal article supplement (PMC3500633)
Supplement: NIHMS418122-supplement-01.pdf [file NIHMS418122-supplement-01.pdf]

Supplemental Material for;

## **Biosynthesis of Athmu, an $\alpha,\gamma$ -hydroxy- $\beta$ -amino acid of pahayokolides A-B**

Li Liu<sup>a</sup>, Daniel W. Bearden<sup>b</sup>, Juan C. Rodriguez<sup>a</sup>, and Kathleen S. Rein<sup>a</sup> \*

<sup>a</sup>*Department of Chemistry and Biochemistry, Florida International University, Miami, Florida 33199, United States*

<sup>b</sup>*Analytical Chemistry Division, National Institute of Standards and Technology, Hollings Marine Laboratory, Charleston, South Carolina 29412, United States*

### **S1. <sup>13</sup>C-NMR of pahayokolide B (2) 49-74 ppm**

**A. Natural abundance**

**B. [1-<sup>13</sup>C]  $\alpha$ -KIC labeled**

**C. [1-<sup>13</sup>C] (+)  $\alpha$ -HIC labeled**

**D. [1-<sup>13</sup>C] (-)  $\alpha$ -HIC labeled**

---

\* Corresponding author. Tel.: +1-305-348-6682; fax: +1-305-348-3772; e-mail: reink@fiu.edu

Pahayokolide B (unlabeled), MeOD, Kelly Hein  
13C, inverse gated  
T=298K  
S2430  
NS-7994

### A. Natural abundance $^{13}\text{C}$ -NMR of pahayokolide B(2)

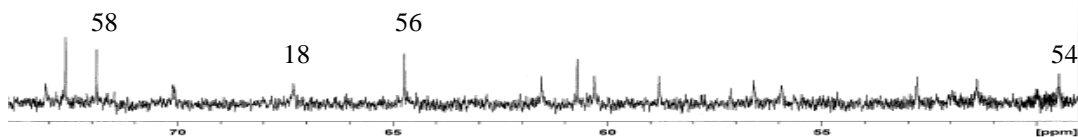

Pahayokolide B (Fed  $\alpha$ -Keto), MeOD, Kelly Hein  
13C, inverse gated  
T=298K  
S2430  
NS-3526

### B. $[1-^{13}\text{C}]$ $\alpha$ -KIC labeled $^{13}\text{C}$ -NMR of pahayokolide B(2)

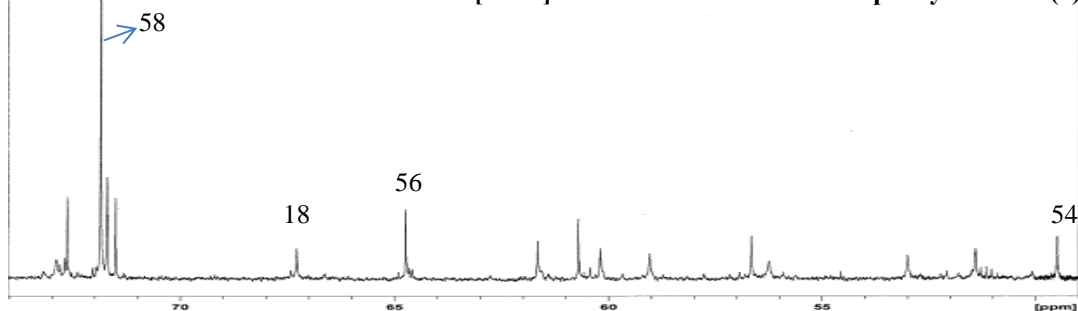

Pahayokolide B (Fed (+)- $\alpha$ -Hydroxy), MeOD, Kelly Hein  
13C, inverse gated  
T=298K  
S2430  
NS-3226

### C. $[1-^{13}\text{C}]$ (+) $\alpha$ -HIC labeled $^{13}\text{C}$ -NMR of pahayokolide B(2)

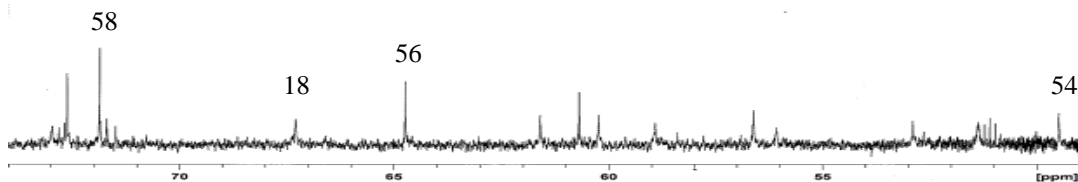

Pahayokolide B (Fed (-)- $\alpha$ -Hydroxy), MeOD, Kelly Hein  
13C, inverse gated  
T=298K  
S2430  
NS-7830

### D. $[1-^{13}\text{C}]$ (-) $\alpha$ -HIC labeled $^{13}\text{C}$ -NMR of pahayokolide B(2)

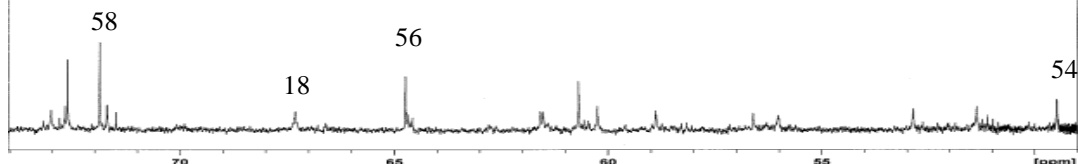

S1. Natural abundance (A),  $[1-^{13}\text{C}]$   $\alpha$ -KIC (B), (+)  $\alpha$ -HIC (C) and (-)  $\alpha$ -HIC (D) labeled  $^{13}\text{C}$ -NMR of pahayokolide B (2) 49-74 ppm
